# Supplementary material
Source: Research Square preprint supplement (doi:10.21203/rs.3.rs-9874630/v1)
Supplement: Supplementary file 1 [file 1d98f92b2e580761aa390002.pdf]

## Supplementary Information

### **3D Diel Utilization Distribution: a novel perspective to understand marine turtle-fishery interaction**

Javier Menéndez-Blázquez \*, Jessica Ruff, Ricardo Sagarminaga, Brendan J. Godley, David March

\***Corresponding author:** Javier Menéndez-Blázquez. e-mail: javier.menendez@uv.es. Present address: Cavanilles Institute of Biodiversity and Evolutionary Biology (ICBiBE), University of Valencia, Spain.

#### Contents

**Supplementary Methods** (Supplementary Method S1)

**Supplementary Tables** (Supplementary Table S1-S6)

**Supplementary Figures** (Supplementary Figures S1-S3)

**Extended information for main text figures**

**Supplementary References**

# Supplementary Methods

## Supplementary Method S1

### *GFW Fishing event API Data Extraction and Vessel Characterization*

Discrete apparent fishing events were extracted within the study area across a 13-year period (2012–2024) using the Global Fishing Watch (GFW) Fishing Events API via the `gfwr` R package. To optimize API request stability and prevent server timeouts given the extensive spatial and temporal scale, queries were executed systematically at a weekly temporal resolution. Each extracted fishing event provided spatial centroids, start and end timestamps, and a unique *vesselId*. Because the fishing events database lacks direct vessel characteristics, a secondary query was compiled using the `get_vessel_info()` function to retrieve historical registry data for each unique identifier. To ensure dynamic data matching, vessel registries were filtered using a time-window approach, assigning the specific gear type active during the year of the recorded fishing event. The multi-year dataset was then strictly filtered to retain only tracking data associated with industrial "TRAWLERS" and "DRIFTING\_LONGLINES".

### *Diel classification, Rasterization, and Spatial Resampling*

For each validated fishing event, apparent fishing effort (hours) was computed as the exact duration between the start and end timestamps. Diel status ("day" or "night") was determined by evaluating the solar elevation angle at 5-minute intervals throughout the duration of each operation using the `solarpos()` function from `suntools` R package (1). Intervals where the sun was above the horizon (solar elevation  $> 0^\circ$ ) were classified as day, and events were categorized based on the absolute majority ( $> 50\%$ ) of their operating duration. Classified events were then converted into spatial features and rasterized annually using the `terra` R package at an initial high resolution of  $0.01^\circ \times 0.01^\circ$  ( $\approx 1 \text{ km}^2$ ), computing the cumulative fishing hours per pixel. To match the scale of subsequent ecological analyses, annual rasters were projected to an equal-area coordinate reference system (EPSG:3035) and bilinearly resampled to a  $10 \times 10 \text{ km}$  grid resolution. Finally, multi-year mean apparent fishing effort maps were derived by averaging the grid layers across the 2012–2024 timeseries for each gear type and diel period.

## Supplementary Tables

**Supplementary Table S1.** Biometrics of and tracking information of loggerhead sea turtle tagged in this study.

| <i>OrganismID</i>    | CCL  | Sex     | Age Class | Deployment Date | Max dive depth (m) | Total dives recorded | Days tracked | Tag model       |
|----------------------|------|---------|-----------|-----------------|--------------------|----------------------|--------------|-----------------|
| 34319                | 50   | unknown | juvenile  | 05/08/2015      | 106.5              | 1174                 | 80           | SPLASH10-344D   |
| 34321                | 83   | ♀       | adult     | 21/06/2017      | 203                | 1050                 | 82           | SPLASH10-344D   |
| 34322                | 66.5 | unknown | juvenile  | 16/07/2017      | 118.5              | 1304                 | 111          | SPLASH10-344D   |
| 34326 <sup>+</sup>   | 52   | unknown | juvenile  | 03/07/2017      | 146.5              | 893                  | 153          | SPLASH10-344D   |
| 34327 <sup>+</sup>   | 58   | ♂       | juvenile  | 26/08/2017      | 91.5               | 1677                 | 215          | SPLASH10-344D   |
| 138120               | 57   | ♀       | juvenile  | 15/02/2018      | 102                | 74                   | 13           | SPLASH10-296F   |
| 151933               | 46   | unknown | juvenile  | 09/07/2016      | 140.5              | 1883                 | 188          | SPLASH10-F-344A |
| 151934 <sup>*</sup>  | 73   | unknown | juvenile  | 26/07/2016      | 253                | 1479                 | 155          | SPLASH10-F-344A |
| 151935               | 65   | unknown | juvenile  | 21/06/2016      | 238                | 4210                 | 272          | SPLASH10-296F   |
| 151936               | 60   | unknown | juvenile  | 26/06/2016      | 130.5              | 2818                 | 247          | SPLASH10-296F   |
| 176001               | 75   | unknown | juvenile  | 01/08/2018      | 124.5              | 2053                 | 88           | SPLASH10-344D   |
| 176002               | 63   | unknown | juvenile  | 30/07/2018      | 253                | 2242                 | 247          | SPLASH10-344D   |
| 176003               | 62   | unknown | juvenile  | 01/06/2019      | 160.5              | 2220                 | 223          | SPLASH10-344D   |
| 176004               | 52   | unknown | juvenile  | 30/07/2018      | 113                | 1832                 | 212          | SPLASH10-344D   |
| 176005 <sup>+</sup>  | 70   | ♂       | juvenile  | 10/05/2019      | 174.5              | 1012                 | 51           | SPLASH10-344D   |
| 181761               | 61   | unknown | juvenile  | 28/09/2019      | 102                | 122                  | 14           | SPLASH10-344D   |
| 181762               | 56   | unknown | juvenile  | 11/07/2019      | 178                | 2377                 | 219          | SPLASH10-344D   |
| 200043 <sup>+</sup>  | 66   | ♀       | juvenile  | 09/07/2020      | 313.5              | 4151                 | 239          | SPLASH10-344D   |
| 200044               | 55   | unknown | juvenile  | 06/06/2021      | 76                 | 1277                 | 68           | SPLASH10-344D   |
| 200045 <sup>++</sup> | 77   | ♀       | adult     | 31/07/2020      | 208                | 1498                 | 93           | SPLASH10-344D   |
| 200046 <sup>+</sup>  | 58   | ♀       | juvenile  | 08/06/2022      | 68                 | 416                  | 26           | SPLASH10-344D   |
| 222014               | 71   | ♀       | adult     | 04/09/2021      | 153                | 1536                 | 142          | SPLASH10-344D   |
| 222015               | 55   | unknown | juvenile  | 18/08/2021      | 253                | 2724                 | 197          | SPLASH10-344D   |
| 222016               | 57   | ♀       | juvenile  | 28/09/2021      | 112                | 1381                 | 203          | SPLASH10-344D   |
| 222017               | 55.5 | ♀       | juvenile  | 05/09/2021      | 134                | 529                  | 62           | SPLASH10-344D   |
| 235395               | 65   | unknown | juvenile  | 08/05/2023      | 163.5              | 1506                 | 70           | SPLASH10-344D   |
| 235396               | 60   | unknown | juvenile  | 08/05/2023      | 208                | 4473                 | 214          | SPLASH10-344D   |
| 235397               | 68.6 | ♂       | juvenile  | 31/07/2023      | 242.5              | 2586                 | 129          | SPLASH10-344D   |

\* For this *organismID*, only the tracking and dive records within the study area are included (as well as in the mains analysis), although its movement range extends beyond the study boundaries; additional information about movement range in Supplementary Information of Harvey-Carroll et al. (2025)

<sup>+</sup> *organismID*, rehabilitated in rescue center (Palma Aquarim, Mallorca, Spain)

**Supplementary Table S2.** Comparison of generalized linear mixed models (GLMM) using a Gamma distribution with log link to select the optimal degrees of freedom (df) for the spline term in explaining mean dive depth. All models include the fixed effects of day/night and season, a natural spline function of time (num\_day) with varying df, and a random intercept for individual ID (organismID). Model performance is assessed via AIC, BIC, log-likelihood, and spline term significance

$$meandep \sim \text{daynight} + \text{season} + \text{splines}::\text{ns}(\text{num\_day}, \text{df} = j) + (1 | \text{organismID})$$

| Model (df spline) | AIC      | BIC      | logLik    | Random variable | $\sigma^2$ | Splines significance             |
|-------------------|----------|----------|-----------|-----------------|------------|----------------------------------|
| df = 1            | 365554.7 | 365625.6 | -182769.3 | 0.0506          | 0.273      | p = 0.395                        |
| df = 2            | 365241.8 | 365321.6 | -182611.9 | 0.0518          | 0.271      | 2/2 terms significant; p < 0.001 |
| df = 5            | 364457.1 | 364563.5 | -182216.5 | 0.0443          | 0.268      | 3/5 terms significant; p < 0.001 |
| df = 8            | 364436.4 | 364569.3 | -182203.2 | 0.0438          | 0.267      | 6/8 terms significant; p < 0.001 |

**Supplementary Table S3.** Comparison of generalized linear mixed models (GLMM) using a Gamma distribution with log link to select the optimal degrees of freedom (df) for the spline term in explaining maximum dive depth. All models include the fixed effects of day/night and season, a natural spline function of time (num\_day) with varying df, and a random intercept for individual ID (organismID). Model performance is assessed via AIC, BIC, log-likelihood, and spline term significance.

$$maxdep \sim \text{daynight} + \text{season} + \text{splines}::\text{ns}(\text{num\_day}, \text{df} = j) + (1 | \text{organismID}),$$

| Model (df spline) | AIC      | BIC      | logLik    | Random variable | $\sigma^2$ | Splines significance             |
|-------------------|----------|----------|-----------|-----------------|------------|----------------------------------|
| df = 1            | 434415.6 | 434486.6 | -217199.8 | 0.048           | 0.310      | p = 0.715                        |
| df = 2            | 433719.5 | 433799.3 | -216850.7 | 0.050           | 0.307      | 2/2 terms significant; p < 0.001 |
| df = 5            | 432844.2 | 432950.6 | -216410.1 | 0.042           | 0.302      | 5/5 terms significant; p < 0.001 |
| df = 8            | 432814.4 | 432947.3 | -216392.2 | 0.042           | 0.302      | 6/8 terms significant; p < 0.001 |

**Supplementary Table S4.** Surface drifting longline gear types and its soak depths ranges (meters) used. LLALB, Longline Albacore [target species: Albacore (*Thunnus alalunga*) or little tunny]; LLAM, Longline American [target species: Swordfish (*Xiphias gladius*)]; LLHB, Longline Home-Base [target species: Swordfish (*Xiphias gladius*)], LLJAP, Longline Japanese [target species: Bluefin tuna (*Thunnus thynnus*)].

| Drifting longline and soak depth range (m)                         | Reference |
|--------------------------------------------------------------------|-----------|
| LLALB ≈ 20- 50<br>LLAM ≈ 50- 90<br>LLHB ≈ 40- 70<br>LLJAP ≈ 50- 90 | (3)       |
| LLALB ≈ 12*<br>LLAM ≈ 70*<br>LLHB ≈ 30- 50<br>LLJAP ≈ 30*          | (4)       |
| LLALB ≈ 30- 90                                                     | (5)       |

\* Set depth provided instead a depth range. Unique depth used this information as maximum depth for drifting longline mean range characterization.

**Supplementary Table S5.** Distribution of maximum dives depths reached by tagged loggerhead sea turtles across depth strata. Data represent the frequency and percentage of total recorded dives ( $n = 52,312$ ) within specified depth ranges, based on 28 satellite-tagged individuals

| Depth range | Number of dives | Percentage of total (%) |
|-------------|-----------------|-------------------------|
| 0 - 10      | 4119            | 7.87                    |
| 10 - 20     | 15867           | 30.33                   |
| 20 - 30     | 9859            | 18.85                   |
| 30 - 40     | 6549            | 12.52                   |
| 40 - 50     | 4597            | 8.79                    |
| 50 - 60     | 3734            | 7.14                    |
| 60 - 70     | 2690            | 5.14                    |
| 70 - 80     | 2066            | 3.95                    |
| 80 - 90     | 1279            | 2.44                    |
| 90 - 100    | 700             | 1.34                    |
| 100 - 120   | 621             | 1.19                    |
| 120 - 140   | 123             | 0.24                    |
| 140 - 160   | 42              | 0.08                    |
| 160 - 180   | 26              | 0.05                    |
| 180 - 200   | 11              | 0.02                    |
| 200 - 240   | 21              | 0.04                    |
| 240 - 280   | 7               | 0.01                    |
| 280 - 320   | 1               | 0.002                   |

**Supplementary Table S6.** Summary of day / night-specific Utilization Distributions (UDs) for each tagged sea turtle in the study. Metrics include 50% core area UD and 95% home-range UD derived from both 2D (area, km<sup>2</sup>) and 3D (volume / km<sup>3</sup>) analyses.

| organismID | 2D    |        |       |        | 3D    |       |       |       |
|------------|-------|--------|-------|--------|-------|-------|-------|-------|
|            | Day   |        | Night |        | Day   |       | Night |       |
|            | 50 UD | 95 UD  | 50 UD | 95 UD  | 50 UD | 95 UD | 50 UD | 95 UD |
| 138120     | 1100  | 4700   | 1200  | 4300   | 15    | 266   | 17    | 93    |
| 151933     | 7400  | 30800  | 8600  | 37300  | 217   | 1426  | 121   | 757   |
| 151934     | 2800  | 11800  | 3200  | 14000  | 102   | 744   | 62    | 438   |
| 151935     | 11300 | 46000  | 12300 | 48600  | 357   | 2408  | 294   | 1697  |
| 151936     | 12100 | 55200  | 14500 | 67800  | 345   | 2357  | 171   | 1099  |
| 176001     | 7400  | 33600  | 9200  | 38900  | 279   | 1919  | 224   | 1367  |
| 176002     | 13500 | 62400  | 14000 | 62500  | 345   | 3307  | 228   | 1598  |
| 176003     | 16700 | 92400  | 17100 | 94100  | 512   | 5298  | 338   | 3231  |
| 176004     | 14100 | 58100  | 15900 | 65000  | 202   | 1653  | 239   | 1463  |
| 176005     | 5400  | 23500  | 5300  | 24100  | 104   | 957   | 96    | 648   |
| 181761     | 1100  | 3500   | 1100  | 3200   | 16    | 181   | 34    | 189   |
| 181762     | 22000 | 119300 | 28700 | 139500 | 494   | 4943  | 424   | 3397  |
| 200043     | 10300 | 42500  | 11600 | 47800  | 577   | 3330  | 308   | 1813  |
| 200044     | 7900  | 41000  | 8600  | 41500  | 242   | 2114  | 106   | 672   |
| 200045     | 1700  | 7600   | 2000  | 12000  | 71    | 422   | 51    | 395   |
| 200046     | 7100  | 33300  | 11300 | 36600  | 148   | 1206  | 231   | 970   |
| 222014     | 15600 | 100400 | 19600 | 125900 | 551   | 5500  | 288   | 2871  |
| 222015     | 32700 | 160300 | 42200 | 174000 | 1119  | 10012 | 1025  | 6079  |
| 222016     | 19300 | 166500 | 29500 | 202300 | 402   | 7333  | 404   | 3930  |
| 222017     | 17000 | 85800  | 19400 | 88400  | 387   | 6955  | 250   | 2946  |
| 235395     | 5600  | 37000  | 7700  | 41600  | 173   | 1942  | 175   | 1477  |
| 235396     | 16500 | 108500 | 26100 | 139300 | 708   | 7046  | 558   | 4020  |
| 235397     | 21900 | 143000 | 24700 | 134700 | 987   | 11061 | 589   | 5810  |
| 34319      | 5700  | 33300  | 6200  | 28900  | 321   | 2359  | 85    | 866   |
| 34321      | 8400  | 39900  | 7100  | 35100  | 225   | 2250  | 131   | 1328  |
| 34322      | 4400  | 17700  | 4400  | 19700  | 115   | 994   | 77    | 589   |
| 34326      | 11100 | 55000  | 12700 | 59600  | 163   | 1439  | 211   | 1446  |
| 34327      | 15900 | 69300  | 15800 | 68200  | 275   | 2201  | 242   | 1585  |

## Supplementary Figures

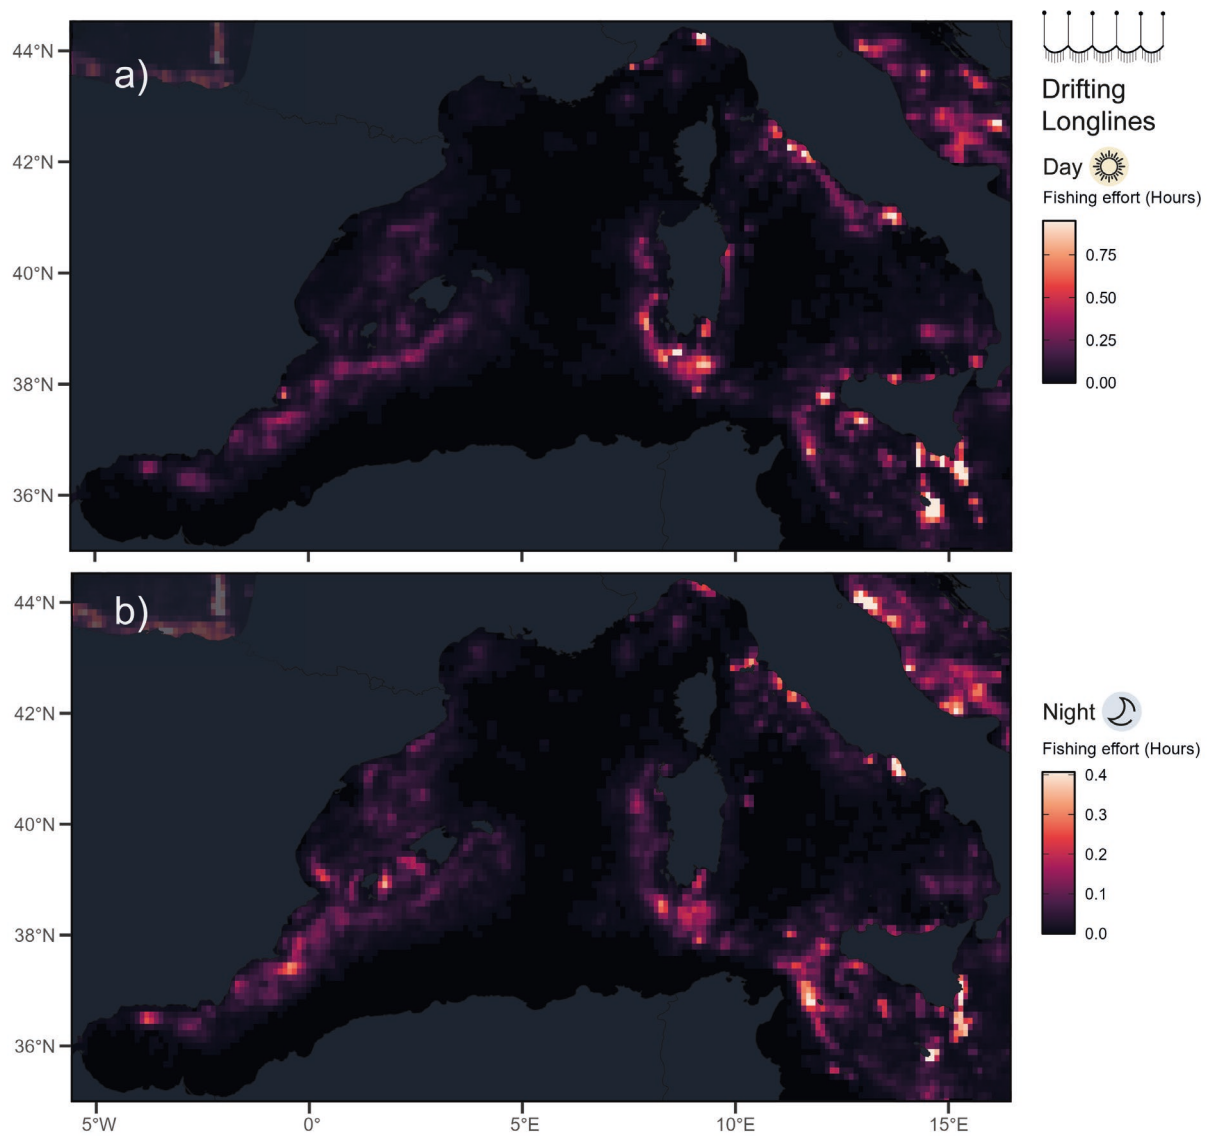

**Supplementary Figure S1.** Mean annual fishing effort (hours) from Global Fishing Watch (GFW) *Fishing Event* data per (a) day and (b) night in the period 2012-2024 by *Drifting Longlines* gear type in the study area. These data are used to assess interactions with the 2D/3D home ranges of tagged sea turtles in the study. The spatial resolution is 0.1° ( $\approx 10 \text{ km}^2$ ).

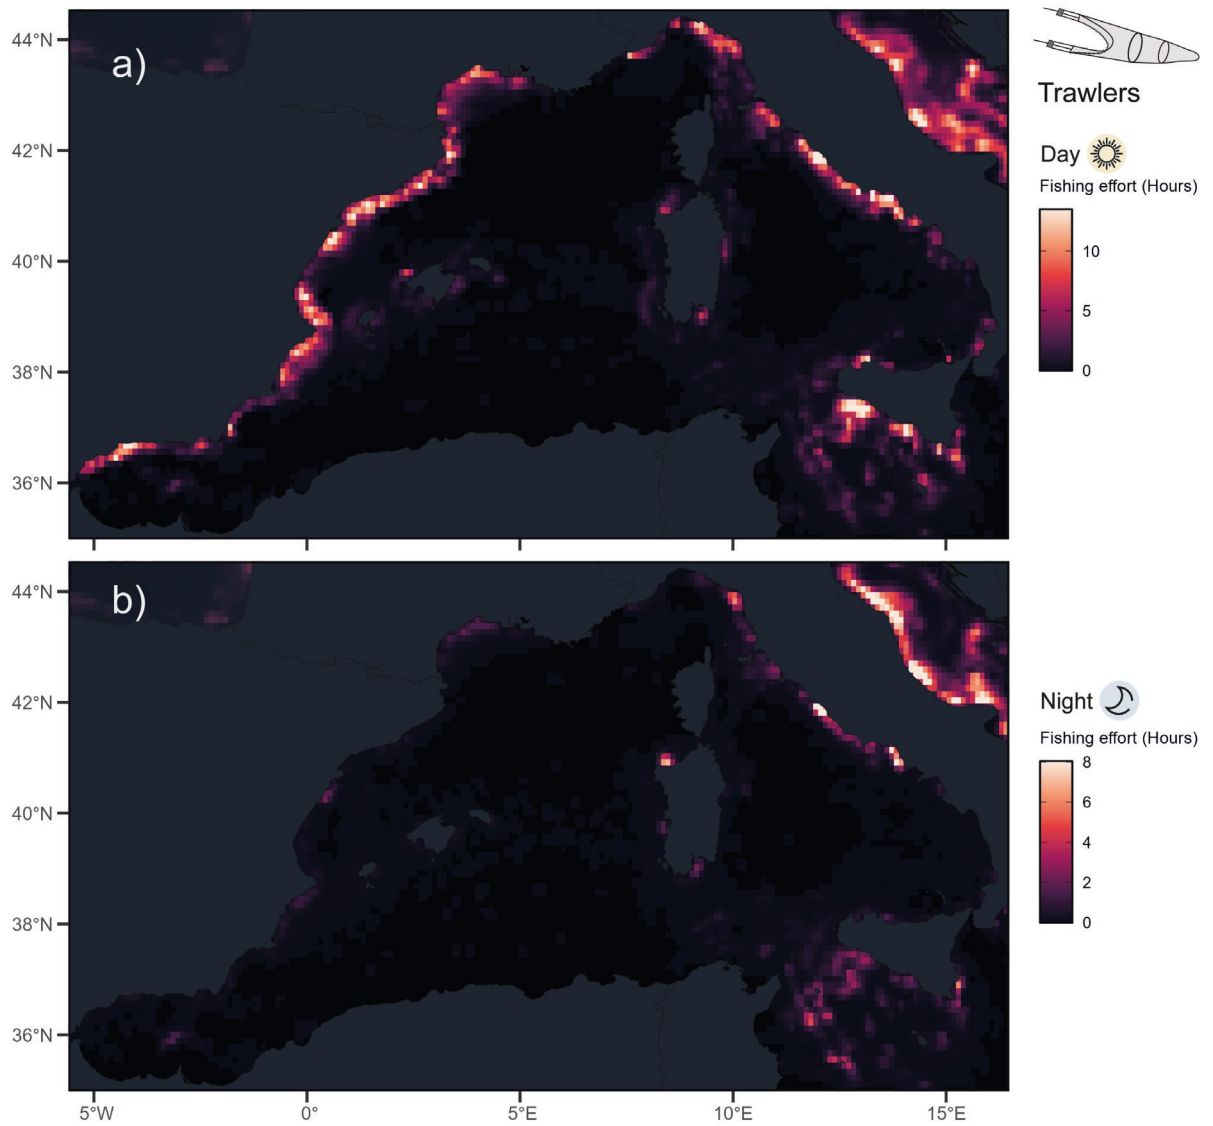

**Supplementary Figure S2.** Mean annual fishing effort (hours) from Global Fishing Watch (GFW) *Fishing Event* data per (a) day and (b) night in the period 2012-2024 by Trawlers gear type in the study area. These data are used to assess interactions with the 2D/3D home ranges of tagged sea turtles in the study. The spatial resolution is 0.1° ( $\approx 10 \text{ km}^2$ ).

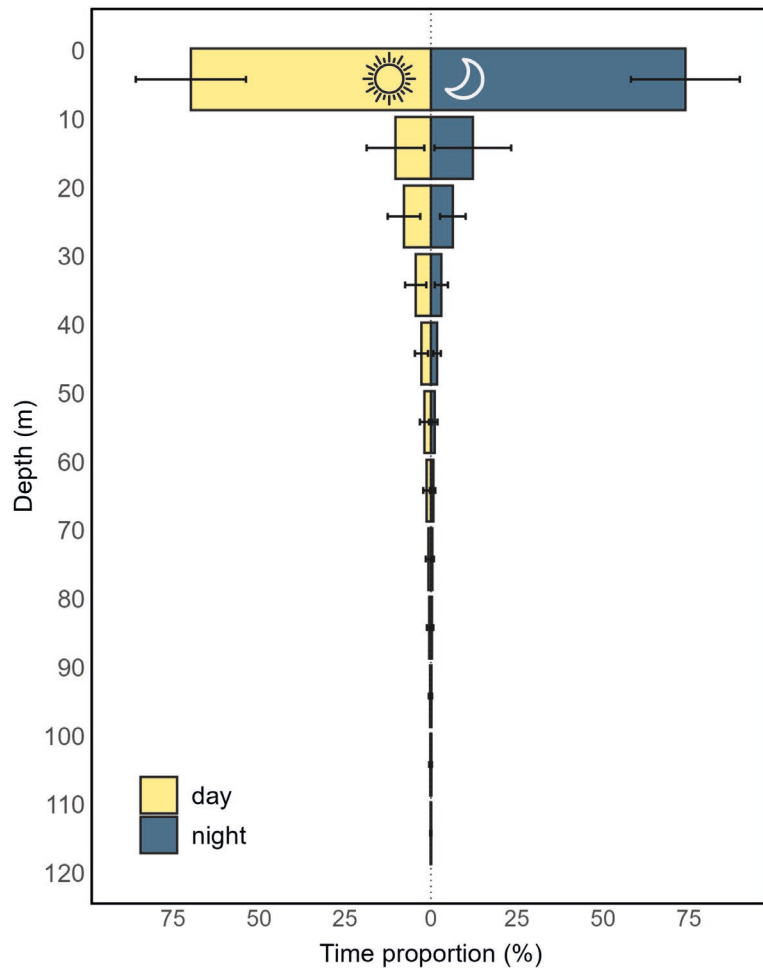

**Supplementary Figure S3.** Proportion of time spent by sea turtles at different depth ranges during days ( $n = 320$ ) and nights periods ( $n = 352$ ). Horizontal bars represent the percentage of time (%) spent at each depth range (in meters), with yellow indicating daytime and blue indicating nighttime. The dotted grey line at 0% serves as a reference for difference day and night time. Error bars indicate standard deviations (SD), periods refer to nights or days where depth records were obtained.

## Extended information for main figures

Supplementary 360° fly-around visualization of the 3D plots in figure 3 and 6 of main text are available in:

[jmenblaz.github.io/page\\_seaturtle\\_3dhomerange\\_results](https://jmenblaz.github.io/page_seaturtle_3dhomerange_results)

## Supplementary References

1. Bivand R, Dokter AM, Huybrechts P, Luque S, Pelletier G, Tedeschi A. suntools: Calculate Sun Position, Sunrise, Sunset, Solar Noon and Twilight [Internet]. Available from: <https://cran.r-project.org/web/packages/suntools/index.html>
2. Harvey-Carroll J, Menéndez-Blázquez J, Crespo-Picazo JL, Sagarminaga R, March D. Unlocking sea turtle diving behaviour from low-temporal resolution time-depth recorders. *Sci Rep.* 2025 Jun 6;15(1):19934. doi:10.1038/s41598-025-05336-y
3. Báez JC, García-Barcelona S, Camiñas JA, Macías D. Fishery strategy affects the loggerhead sea turtle mortality trend due to the longline bycatch. *Fisheries Research.* 2019 Apr 1;212:21–8. doi:10.1016/j.fishres.2018.11.032
4. García-Barcelona S, Urbina JMO de, Serna JM de la, Alot E, Macías D. Seabird bycatch in Spanish Mediterranean large pelagic longline fisheries, 2000-2008. *Aquatic Living Resources.* 2010 Oct;23(4):363–71. doi:10.1051/alr/2010022
5. Camiñas JA, Rivetti N, de Urbina JO, Garcia-Barcelona S, Rioja P, Gómez-Vives MJ, et al. Analysis of the loggerhead (*Caretta caretta*) bycatch in mediterranean surface longlines from depth sensors data. *Vol. 27.* 2016;27(2):49–51.
